# Supplementary material for: What Is on the Menu?—A Quantitative Analysis on Label Format among (Potential) Restaurant Guests and Restaurant Owners
Source: MDPI journal article supplement (doi:10.3390/ijerph182312500), 2021-11-27
Supplement: s1 [file s1]

## Supplementary S2

**Table S2.** Relation between characteristics of the potential guests and label preference (values are represented as numbers (%))

*No relation between label preference and the characteristics; gender, monthly income, frequency of visiting a restaurant, reasons to visit an restaurant, health consciousness could be observed. (Pearson's chi-square test goodness of fit).*

| Characteristics                            | Logo | Ranking | Information | Total |         | p-value |
|--------------------------------------------|------|---------|-------------|-------|---------|---------|
| <b>All</b>                                 | 107  | 164     | 115         | 386   |         |         |
| <b>Gender</b>                              |      |         |             |       |         | 0.184   |
| Female                                     | 79   | 136     | 89          | 304   | (79%)   |         |
| Male                                       | 28   | 28      | 26          | 82    | (21%)   |         |
| <b>Monthly income (€)</b>                  |      |         |             |       |         | 0.125   |
| <1.500                                     | 56   | 95      | 62          | 213   | (55%)   |         |
| 1.500 - < 3.000                            | 37   | 44      | 48          | 129   | (33%)   |         |
| 3.000 - < 5.000                            | 12   | 10      | 5           | 27    | (7%)    |         |
| 5.000 - < 7.000                            | 2    | 3       | 1           | 6     | (2%)    |         |
| ≥ 7.000                                    | 0    | 1       | 0           | 1     | (0.3%)  |         |
| <b>How often do you visit a restaurant</b> |      |         |             |       |         | 0.107   |
| Daily                                      | 0    | 0       | 1           | 1     | (0.3%)  |         |
| Weekly (1 or 2 times per week)             | 7    | 11      | 15          | 33    | (8.5%)  |         |
| Monthly (1 or 2 times per month)           | 42   | 83      | 48          | 173   | (44.8%) |         |
| Less than once a month                     | 58   | 70      | 51          | 179   | (26.4%) |         |
| <b>Reason to visit a restaurant</b>        |      |         |             |       |         | 0.639   |
| Business setting                           | 0    | 0       | 1           | 1     | (0.3%)  |         |
| Informal setting                           | 87   | 132     | 94          | 313   | (81.1%) |         |
| Both business as informal setting          | 20   | 32      | 20          | 72    | (18.7%) |         |
| <b>Health consciousness*</b>               |      |         |             |       |         |         |
| Below average                              | 11   | 11      | 6           | 28    | (7.3%)  |         |
| Average                                    | 41   | 72      | 41          | 154   | (39.9%) |         |
| Above average                              | 55   | 81      | 68          | 204   | (52.8%) | 0.184   |

\*Health consciousness was determined based on five questions using a 5-point Likert scale (1=strongly disagree, 5=strongly agree). Outcomes on health consciousness were categorized in three groups, based on the Likert scale (below average (score <2.5), average (score 2.5 – 3.4), above average (score >3.4)). Scores of all five questions were used (Cronbach's alfa = 0.815) to calculate the average participants' health consciousness.
