# Supplementary material for: What Is on the Menu?—A Quantitative Analysis on Label Format among (Potential) Restaurant Guests and Restaurant Owners
Source: MDPI journal article supplement (doi:10.3390/ijerph182312500), 2021-11-27
Supplement: s1 [file s1]

## Supplementary S1. Questionnaires

### A. Questionnaire restaurant guests

|    | Question                                                                                                                                                                                                                                                                                                                                                                                                                                                                                                                                                                                   |
|----|--------------------------------------------------------------------------------------------------------------------------------------------------------------------------------------------------------------------------------------------------------------------------------------------------------------------------------------------------------------------------------------------------------------------------------------------------------------------------------------------------------------------------------------------------------------------------------------------|
| 1. | What is your gender? <ul style="list-style-type: none"><li><input type="radio"/> Male</li><li><input type="radio"/> Female</li></ul>                                                                                                                                                                                                                                                                                                                                                                                                                                                       |
| 2. | What is your age?<br>_____                                                                                                                                                                                                                                                                                                                                                                                                                                                                                                                                                                 |
| 3. | What is your residence?<br>_____                                                                                                                                                                                                                                                                                                                                                                                                                                                                                                                                                           |
| 4. | I am: <ul style="list-style-type: none"><li><input type="radio"/> High school student</li><li><input type="radio"/> College student</li><li><input type="radio"/> Working, full time (36 or more hours per week)</li><li><input type="radio"/> Working, parttime (less than 36 hours per week)</li><li><input type="radio"/> (currently unemployed</li><li><input type="radio"/> Stay-at-home as a mom or dad</li><li><input type="radio"/> Incapacitated</li><li><input type="radio"/> Retired</li></ul>                                                                                  |
| 5. | What is your monthly income (net per month)? <ul style="list-style-type: none"><li><input type="radio"/> Less than € 1500</li><li><input type="radio"/> €1500 - €2000</li><li><input type="radio"/> €2000 - €3000</li><li><input type="radio"/> €3000 - €4000</li><li><input type="radio"/> €4000 - €5000</li><li><input type="radio"/> €5000 - €6000</li><li><input type="radio"/> €6000 - €7000</li><li><input type="radio"/> €7000 - €10 000</li><li><input type="radio"/> More than €10 000</li></ul>                                                                                  |
| 6. | What is your highest degree or level of education?<br>(graduated or studying at the moment) <ul style="list-style-type: none"><li><input type="radio"/> Primary school</li><li><input type="radio"/> Lower vocational education</li><li><input type="radio"/> Preparatory secondary vocational education</li><li><input type="radio"/> Sr. Secondary vocational education</li><li><input type="radio"/> Sr. General secondary &amp; pre-university education</li><li><input type="radio"/> Higher professional education</li><li><input type="radio"/> Academic higher education</li></ul> |
| 7. | On average, how often do you dine out in a restaurant ( <b>not</b> fast food)? <ul style="list-style-type: none"><li><input type="radio"/> Daily (every day)</li><li><input type="radio"/> Weekly (1-2 times a week)</li><li><input type="radio"/> Monthly (1-2 times a month)</li></ul>                                                                                                                                                                                                                                                                                                   |

|     |                                                                                                                                                                                                                                                                                                                                                                                                                                                                                                                                                                                                                                                                                                                                                                                                                                                                                                                                                                                                                                                                                                                                                                                            |
|-----|--------------------------------------------------------------------------------------------------------------------------------------------------------------------------------------------------------------------------------------------------------------------------------------------------------------------------------------------------------------------------------------------------------------------------------------------------------------------------------------------------------------------------------------------------------------------------------------------------------------------------------------------------------------------------------------------------------------------------------------------------------------------------------------------------------------------------------------------------------------------------------------------------------------------------------------------------------------------------------------------------------------------------------------------------------------------------------------------------------------------------------------------------------------------------------------------|
|     | <ul style="list-style-type: none"> <li>○ Less than once a month</li> </ul>                                                                                                                                                                                                                                                                                                                                                                                                                                                                                                                                                                                                                                                                                                                                                                                                                                                                                                                                                                                                                                                                                                                 |
| 8.  | <p>When dining out, this is in a:</p> <ul style="list-style-type: none"> <li>○ Business setting</li> <li>○ Social setting</li> <li>○ Both business and social setting</li> </ul>                                                                                                                                                                                                                                                                                                                                                                                                                                                                                                                                                                                                                                                                                                                                                                                                                                                                                                                                                                                                           |
| 9.  | <p>For the questions below, indicate whether you agree or not (1=disagree, 5=agree)</p> <p>Living life in best possible health is very important to me.</p> <p><input type="checkbox"/> 1   <input type="checkbox"/> 2   <input type="checkbox"/> 3   <input type="checkbox"/> 4   <input type="checkbox"/> 5</p> <p>Eating right, exercising and relax timely will keep me healthy for life.</p> <p><input type="checkbox"/> 1   <input type="checkbox"/> 2   <input type="checkbox"/> 3   <input type="checkbox"/> 4   <input type="checkbox"/> 5</p> <p>My health depends on how well I take care of myself.</p> <p><input type="checkbox"/> 1   <input type="checkbox"/> 2   <input type="checkbox"/> 3   <input type="checkbox"/> 4   <input type="checkbox"/> 5</p> <p>I actively try to prevent diseases and illness.</p> <p><input type="checkbox"/> 1   <input type="checkbox"/> 2   <input type="checkbox"/> 3   <input type="checkbox"/> 4   <input type="checkbox"/> 5</p> <p>I do everything I can to stay healthy.</p> <p><input type="checkbox"/> 1   <input type="checkbox"/> 2   <input type="checkbox"/> 3   <input type="checkbox"/> 4   <input type="checkbox"/> 5</p> |
| 10. | <p>What do you consider important when choosing a dish in a restaurant (1 = important, 5 = very important)</p> <p>Taste</p> <p><input type="checkbox"/> 1   <input type="checkbox"/> 2   <input type="checkbox"/> 3   <input type="checkbox"/> 4   <input type="checkbox"/> 5</p> <p>Price</p> <p><input type="checkbox"/> 1   <input type="checkbox"/> 2   <input type="checkbox"/> 3   <input type="checkbox"/> 4   <input type="checkbox"/> 5</p> <p>Health aspects</p> <p><input type="checkbox"/> 1   <input type="checkbox"/> 2   <input type="checkbox"/> 3   <input type="checkbox"/> 4   <input type="checkbox"/> 5</p> <p>Chefs' recommendations</p> <p><input type="checkbox"/> 1   <input type="checkbox"/> 2   <input type="checkbox"/> 3   <input type="checkbox"/> 4   <input type="checkbox"/> 5</p>                                                                                                                                                                                                                                                                                                                                                                       |
| 11. | <p>To what extent would you let a menu label influence your menu choice? (1= not, 5=a lot)</p> <p><input type="checkbox"/> 1   <input type="checkbox"/> 2   <input type="checkbox"/> 3   <input type="checkbox"/> 4   <input type="checkbox"/> 5</p>                                                                                                                                                                                                                                                                                                                                                                                                                                                                                                                                                                                                                                                                                                                                                                                                                                                                                                                                       |
| 12. | <p>When a dish contains a label to indicate the 'healthy choice', I expect this dish to be 1= not tasty, 5 = very tasty.</p> <p><input type="checkbox"/> 1   <input type="checkbox"/> 2   <input type="checkbox"/> 3   <input type="checkbox"/> 4   <input type="checkbox"/> 5</p>                                                                                                                                                                                                                                                                                                                                                                                                                                                                                                                                                                                                                                                                                                                                                                                                                                                                                                         |
| 13. | <p>Would you like to know the nutritional value of your restaurant dish?</p>                                                                                                                                                                                                                                                                                                                                                                                                                                                                                                                                                                                                                                                                                                                                                                                                                                                                                                                                                                                                                                                                                                               |

|                                                                                                                                                                                                                                                                                                                |                                                                                                                                                                                                                                        |
|----------------------------------------------------------------------------------------------------------------------------------------------------------------------------------------------------------------------------------------------------------------------------------------------------------------|----------------------------------------------------------------------------------------------------------------------------------------------------------------------------------------------------------------------------------------|
|                                                                                                                                                                                                                                                                                                                | <input type="radio"/> Yes<br><input type="radio"/> No                                                                                                                                                                                  |
| <p>Menu labeling is the labeling of dishes on the menu that meet certain health criteria. This way guests can see which dishes are a conscious choice. Menu labeling is already widely used at fast food chains such as McDonalds and Burger King, but rarely in the traditional restaurants and catering.</p> |                                                                                                                                                                                                                                        |
| 14.                                                                                                                                                                                                                                                                                                            | <p>In which setting would you be interested in menu labeling?</p> <input type="radio"/> In a social setting<br><input type="radio"/> In a business setting<br><input type="radio"/> In both<br><input type="radio"/> I am not intested |

Below some questions will follow with regard to three developed menu labels. The next three questions relate to the image below. Please take a proper look at this image.

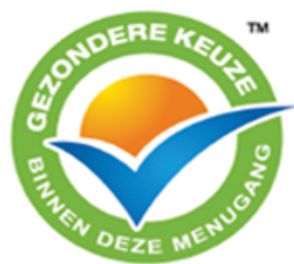

- MEAL SALADS**
- Cesar salad** with grilled chicken, romaine lettuce, Italian cheese and croutons
- Tuna Salad** with tuna, green beans, egg, black olives and herb dressing
- Chicken bacon salad** with pasta, chicken, bacon, red pepper and honey mustard dressing
- MAIN DISHES**
- Pasta prosciutto** with macaroni, ham and creamy cheese sauce
- Spaghetti bolognese** spaghetti with minced beef in a red tomato sauce, smoked bacon and Italian herbs
- Richly filled lasagna** with minced beef, Bolognese sauce, fresh lasagne sheets and vegetables
- Leek curry stew** with fried ground meat, creamy potato puree and curry gravy
- Chicken tandoori** Indian dish with marinated chicken, tomato and basmati rice
- Rosemary chicken** marinated chicken breast with seasoned baby potatoes, haricots verts and rosemary

15. What does this menu labeling format communicates according to you? (1 = not, 5 = strongly)

|                               |   |   |   |   |   |
|-------------------------------|---|---|---|---|---|
| Good to prevent heart disease | 1 | 2 | 3 | 4 | 5 |
| Good nutrient composition     | 1 | 2 | 3 | 4 | 5 |
| Low energy                    | 1 | 2 | 3 | 4 | 5 |
| Low in fat                    | 1 | 2 | 3 | 4 | 5 |
| Conscious choice              | 1 | 2 | 3 | 4 | 5 |
| Organic                       | 1 | 2 | 3 | 4 | 5 |
| Sustainable                   | 1 | 2 | 3 | 4 | 5 |
| Healthy choice                | 1 | 2 | 3 | 4 | 5 |
| Tasteful                      | 1 | 2 | 3 | 4 | 5 |

|    |                                                                                                                                                                                                                                                                                |
|----|--------------------------------------------------------------------------------------------------------------------------------------------------------------------------------------------------------------------------------------------------------------------------------|
| 16 | To what extent would this menu label format influence your menu choice from a restaurant menu?<br>(1= not, 5 =a lot)<br><br><input type="checkbox"/> 1 <input type="checkbox"/> 2 <input type="checkbox"/> 3 <input type="checkbox"/> 4 <input type="checkbox"/> 5             |
| 17 | To what extent do you expect dishes with this menu label format to actually be a healthy choice.<br>(1 = not, 5 = very strongly)<br><br><input type="checkbox"/> 1 <input type="checkbox"/> 2 <input type="checkbox"/> 3 <input type="checkbox"/> 4 <input type="checkbox"/> 5 |

The next three questions relate to the image below. Please take a proper look at this image.

**MEAL SALADS**

☆☆☆ **Cesar salad** with grilled chicken, romaine lettuce, Italian cheese and croutons

☆☆☆ **Tuna Salad** with tuna, green beans, egg, black olives and herb dressing

☆☆☆ **Chicken bacon salad** with pasta, chicken, bacon, red pepper and honey mustard dressing

**MAIN DISHES**

☆☆☆ **Pasta prosciutto** with macaroni, ham and creamy cheese sauce

☆☆☆ **Spaghetti bolognese** spaghetti with minced beef in a red tomato sauce, smoked bacon and Italian herbs

☆☆☆ **Richly filled lasagna** with minced beef, Bolognese sauce, fresh lasagne sheets and vegetables

☆☆☆ **Leek curry stew** with fried ~~minced~~ meat, creamy potato puree and curry gravy

☆☆☆ **Chicken tandoori** Indian dish with marinated chicken, tomato and basmati rice

☆☆☆ **Rosemary chicken** marinated chicken breast with seasoned baby potatoes, haricots verts and rosemary

☆☆☆ Less healthy      ☆☆☆ Healthier      ☆☆☆ The healthiest choice

18

What does this menu labeling format communicates according to you?  
(1 = not, 5 = strongly)

|                               |   |   |   |   |   |
|-------------------------------|---|---|---|---|---|
| Good to prevent heart disease | 1 | 2 | 3 | 4 | 5 |
| Good nutrient composition     | 1 | 2 | 3 | 4 | 5 |
| Low energy                    | 1 | 2 | 3 | 4 | 5 |
| Low in fat                    | 1 | 2 | 3 | 4 | 5 |
| Conscious choice              | 1 | 2 | 3 | 4 | 5 |
| Organic                       | 1 | 2 | 3 | 4 | 5 |
| Sustainable                   | 1 | 2 | 3 | 4 | 5 |
| Healthy choice                | 1 | 2 | 3 | 4 | 5 |
| Tasteful                      | 1 | 2 | 3 | 4 | 5 |

|    |                                                                                                                                                                                                                                                                                                |
|----|------------------------------------------------------------------------------------------------------------------------------------------------------------------------------------------------------------------------------------------------------------------------------------------------|
| 19 | <p>To what extent would this menu label format influence your menu choice from a restaurant menu?<br/>(1= not, 5 =a lot)</p> <p><input type="checkbox"/> 1   <input type="checkbox"/> 2   <input type="checkbox"/> 3   <input type="checkbox"/> 4   <input type="checkbox"/> 5</p>             |
| 20 | <p>To what extent do you expect dishes with this menu label format to actually be a healthy choice.<br/>(1 = not, 5 = very strongly)</p> <p><input type="checkbox"/> 1   <input type="checkbox"/> 2   <input type="checkbox"/> 3   <input type="checkbox"/> 4   <input type="checkbox"/> 5</p> |

The next three questions relate to the image below. Please take a proper look at this image.

|             |                                                                                                             |
|-------------|-------------------------------------------------------------------------------------------------------------|
| <b>Kcal</b> | <b>MEAL SALADS</b>                                                                                          |
| <b>465</b>  | <b>Ceasar salad</b> with grilled chicken, romaine lettuce, Italian cheese and croutons                      |
| <b>460</b>  | <b>Tuna Salad</b> with tuna, green beans, egg, black olives and herb dressing                               |
| <b>740</b>  | <b>Chicken bacon salad</b> with pasta, chicken, bacon, red pepper and honey mustard dressing                |
|             | <b>MAIN DISHES</b>                                                                                          |
| <b>690</b>  | <b>Pasta prosciutto</b> with macaroni, ham and creamy cheese sauce                                          |
| <b>580</b>  | <b>Spaghetti bolognese</b> spaghetti with minced beef in a red tomato sauce, smoked bacon and Italian herbs |
| <b>530</b>  | <b>Richly filled lasagna</b> with minced beef, Bolognese sauce, fresh lasagne sheets and vegetables         |
| <b>585</b>  | <b>Leek curry stew</b> with fried ground meat, creamy potato puree and curry gravy                          |
| <b>590</b>  | <b>Chicken tandoori</b> Indian dish with marinated chicken, tomato and basmati rice                         |
| <b>490</b>  | <b>Rosemary chicken</b> marinated chicken breast with seasoned baby potatoes, haricots verts and rosemary   |

|                               |                                                                                                                                                                                                                                                                                                                                                                                                                                                                                                                                                                                                                                                                                                                                                                                                                                                                                             |                               |   |   |   |   |   |                           |   |   |   |   |   |            |   |   |   |   |   |            |   |   |   |   |   |                  |   |   |   |   |   |         |   |   |   |   |   |             |   |   |   |   |   |                |   |   |   |   |   |          |   |   |   |   |   |
|-------------------------------|---------------------------------------------------------------------------------------------------------------------------------------------------------------------------------------------------------------------------------------------------------------------------------------------------------------------------------------------------------------------------------------------------------------------------------------------------------------------------------------------------------------------------------------------------------------------------------------------------------------------------------------------------------------------------------------------------------------------------------------------------------------------------------------------------------------------------------------------------------------------------------------------|-------------------------------|---|---|---|---|---|---------------------------|---|---|---|---|---|------------|---|---|---|---|---|------------|---|---|---|---|---|------------------|---|---|---|---|---|---------|---|---|---|---|---|-------------|---|---|---|---|---|----------------|---|---|---|---|---|----------|---|---|---|---|---|
| 21.                           | <p>What does this menu labeling format communicates according to you?<br/>(1 = not, 5 = strongly)</p> <table><tr><td>Good to prevent heart disease</td><td>1</td><td>2</td><td>3</td><td>4</td><td>5</td></tr><tr><td>Good nutrient composition</td><td>1</td><td>2</td><td>3</td><td>4</td><td>5</td></tr><tr><td>Low energy</td><td>1</td><td>2</td><td>3</td><td>4</td><td>5</td></tr><tr><td>Low in fat</td><td>1</td><td>2</td><td>3</td><td>4</td><td>5</td></tr><tr><td>Conscious choice</td><td>1</td><td>2</td><td>3</td><td>4</td><td>5</td></tr><tr><td>Organic</td><td>1</td><td>2</td><td>3</td><td>4</td><td>5</td></tr><tr><td>Sustainable</td><td>1</td><td>2</td><td>3</td><td>4</td><td>5</td></tr><tr><td>Healthy choice</td><td>1</td><td>2</td><td>3</td><td>4</td><td>5</td></tr><tr><td>Tasteful</td><td>1</td><td>2</td><td>3</td><td>4</td><td>5</td></tr></table> | Good to prevent heart disease | 1 | 2 | 3 | 4 | 5 | Good nutrient composition | 1 | 2 | 3 | 4 | 5 | Low energy | 1 | 2 | 3 | 4 | 5 | Low in fat | 1 | 2 | 3 | 4 | 5 | Conscious choice | 1 | 2 | 3 | 4 | 5 | Organic | 1 | 2 | 3 | 4 | 5 | Sustainable | 1 | 2 | 3 | 4 | 5 | Healthy choice | 1 | 2 | 3 | 4 | 5 | Tasteful | 1 | 2 | 3 | 4 | 5 |
| Good to prevent heart disease | 1                                                                                                                                                                                                                                                                                                                                                                                                                                                                                                                                                                                                                                                                                                                                                                                                                                                                                           | 2                             | 3 | 4 | 5 |   |   |                           |   |   |   |   |   |            |   |   |   |   |   |            |   |   |   |   |   |                  |   |   |   |   |   |         |   |   |   |   |   |             |   |   |   |   |   |                |   |   |   |   |   |          |   |   |   |   |   |
| Good nutrient composition     | 1                                                                                                                                                                                                                                                                                                                                                                                                                                                                                                                                                                                                                                                                                                                                                                                                                                                                                           | 2                             | 3 | 4 | 5 |   |   |                           |   |   |   |   |   |            |   |   |   |   |   |            |   |   |   |   |   |                  |   |   |   |   |   |         |   |   |   |   |   |             |   |   |   |   |   |                |   |   |   |   |   |          |   |   |   |   |   |
| Low energy                    | 1                                                                                                                                                                                                                                                                                                                                                                                                                                                                                                                                                                                                                                                                                                                                                                                                                                                                                           | 2                             | 3 | 4 | 5 |   |   |                           |   |   |   |   |   |            |   |   |   |   |   |            |   |   |   |   |   |                  |   |   |   |   |   |         |   |   |   |   |   |             |   |   |   |   |   |                |   |   |   |   |   |          |   |   |   |   |   |
| Low in fat                    | 1                                                                                                                                                                                                                                                                                                                                                                                                                                                                                                                                                                                                                                                                                                                                                                                                                                                                                           | 2                             | 3 | 4 | 5 |   |   |                           |   |   |   |   |   |            |   |   |   |   |   |            |   |   |   |   |   |                  |   |   |   |   |   |         |   |   |   |   |   |             |   |   |   |   |   |                |   |   |   |   |   |          |   |   |   |   |   |
| Conscious choice              | 1                                                                                                                                                                                                                                                                                                                                                                                                                                                                                                                                                                                                                                                                                                                                                                                                                                                                                           | 2                             | 3 | 4 | 5 |   |   |                           |   |   |   |   |   |            |   |   |   |   |   |            |   |   |   |   |   |                  |   |   |   |   |   |         |   |   |   |   |   |             |   |   |   |   |   |                |   |   |   |   |   |          |   |   |   |   |   |
| Organic                       | 1                                                                                                                                                                                                                                                                                                                                                                                                                                                                                                                                                                                                                                                                                                                                                                                                                                                                                           | 2                             | 3 | 4 | 5 |   |   |                           |   |   |   |   |   |            |   |   |   |   |   |            |   |   |   |   |   |                  |   |   |   |   |   |         |   |   |   |   |   |             |   |   |   |   |   |                |   |   |   |   |   |          |   |   |   |   |   |
| Sustainable                   | 1                                                                                                                                                                                                                                                                                                                                                                                                                                                                                                                                                                                                                                                                                                                                                                                                                                                                                           | 2                             | 3 | 4 | 5 |   |   |                           |   |   |   |   |   |            |   |   |   |   |   |            |   |   |   |   |   |                  |   |   |   |   |   |         |   |   |   |   |   |             |   |   |   |   |   |                |   |   |   |   |   |          |   |   |   |   |   |
| Healthy choice                | 1                                                                                                                                                                                                                                                                                                                                                                                                                                                                                                                                                                                                                                                                                                                                                                                                                                                                                           | 2                             | 3 | 4 | 5 |   |   |                           |   |   |   |   |   |            |   |   |   |   |   |            |   |   |   |   |   |                  |   |   |   |   |   |         |   |   |   |   |   |             |   |   |   |   |   |                |   |   |   |   |   |          |   |   |   |   |   |
| Tasteful                      | 1                                                                                                                                                                                                                                                                                                                                                                                                                                                                                                                                                                                                                                                                                                                                                                                                                                                                                           | 2                             | 3 | 4 | 5 |   |   |                           |   |   |   |   |   |            |   |   |   |   |   |            |   |   |   |   |   |                  |   |   |   |   |   |         |   |   |   |   |   |             |   |   |   |   |   |                |   |   |   |   |   |          |   |   |   |   |   |
| 22.                           | <p>To what extent would this menu label format influence your menu choice from a restaurant menu?<br/>(1= not, 5 =a lot)</p> <p><input type="checkbox"/> 1   <input type="checkbox"/> 2   <input type="checkbox"/> 3   <input type="checkbox"/> 4   <input type="checkbox"/> 5</p>                                                                                                                                                                                                                                                                                                                                                                                                                                                                                                                                                                                                          |                               |   |   |   |   |   |                           |   |   |   |   |   |            |   |   |   |   |   |            |   |   |   |   |   |                  |   |   |   |   |   |         |   |   |   |   |   |             |   |   |   |   |   |                |   |   |   |   |   |          |   |   |   |   |   |

|     |                                                                                                                                                                                                                                                                                                                             |
|-----|-----------------------------------------------------------------------------------------------------------------------------------------------------------------------------------------------------------------------------------------------------------------------------------------------------------------------------|
| 23. | <p>To what extent do you expect dishes with this menu label format to actually be a healthy choice.</p> <p>(1 = not, 5 = very strongly)</p> <p><input type="checkbox"/> 1   <input type="checkbox"/> 2   <input type="checkbox"/> 3   <input type="checkbox"/> 4   <input type="checkbox"/> 5</p>                           |
| 24. | <p>When a * is displayed on a restaurant menu, do you search on the menu for its meaning (1= never, 5 = always)?</p> <p><input type="checkbox"/> 1   <input type="checkbox"/> 2   <input type="checkbox"/> 3   <input type="checkbox"/> 4   <input type="checkbox"/> 5</p>                                                  |
| 25. | <p>Which menu label format to communicate that a dish is a healthy and conscious choice do you prefer most?</p> <ul style="list-style-type: none"> <li><input type="radio"/> Logo (menu label 1)</li> <li><input type="radio"/> Ranking (menu label 2)</li> <li><input type="radio"/> Information (menu label 3)</li> </ul> |

#### B. Questionnaire restaurant owners

|                                                                                                                                                                                                                                                                                                                |                                                                                                                                                                                                                                                                                                                                                                                                                                                                                                                                                                                                            |
|----------------------------------------------------------------------------------------------------------------------------------------------------------------------------------------------------------------------------------------------------------------------------------------------------------------|------------------------------------------------------------------------------------------------------------------------------------------------------------------------------------------------------------------------------------------------------------------------------------------------------------------------------------------------------------------------------------------------------------------------------------------------------------------------------------------------------------------------------------------------------------------------------------------------------------|
| 1.                                                                                                                                                                                                                                                                                                             | <p>What is your gender?</p> <ul style="list-style-type: none"> <li><input type="radio"/> Male</li> <li><input type="radio"/> Female</li> </ul>                                                                                                                                                                                                                                                                                                                                                                                                                                                             |
| 2.                                                                                                                                                                                                                                                                                                             | <p>What is your age?</p> <p>_____</p>                                                                                                                                                                                                                                                                                                                                                                                                                                                                                                                                                                      |
| 3.                                                                                                                                                                                                                                                                                                             | <p>What is your highest degree or level of education?<br/>(graduated or studying at the moment)</p> <ul style="list-style-type: none"> <li><input type="radio"/> Primary school</li> <li><input type="radio"/> Lower vocational education</li> <li><input type="radio"/> Preparatory secondary vocational education</li> <li><input type="radio"/> Sr. Secondary vocational education</li> <li><input type="radio"/> Sr. General secondary &amp; pre-university education</li> <li><input type="radio"/> Higher professional education</li> <li><input type="radio"/> Academic higher education</li> </ul> |
| <p>Menu labeling is the labeling of dishes on the menu that meet certain health criteria. This way guests can see which dishes are a conscious choice. Menu labeling is already widely used at fast food chains such as McDonalds and Burger King, but rarely in the traditional restaurants and catering.</p> |                                                                                                                                                                                                                                                                                                                                                                                                                                                                                                                                                                                                            |
| 4.                                                                                                                                                                                                                                                                                                             | <p>Do you think it would be possible to implement menu labeling in restaurants?<br/>(1 = easy, 5 = difficult)</p> <p><input type="checkbox"/> 1   <input type="checkbox"/> 2   <input type="checkbox"/> 3   <input type="checkbox"/> 4   <input type="checkbox"/> 5</p>                                                                                                                                                                                                                                                                                                                                    |
| 5.                                                                                                                                                                                                                                                                                                             | <p>In what areas do you anticipate problems when implementing menu labeling?</p>                                                                                                                                                                                                                                                                                                                                                                                                                                                                                                                           |

|                                                                                                                                                                                                                                                                                                                                                                                                                                                                                                                                                                                                                                                                                                                                                                                                                                                                                                                                                                                                                                                                                                                                                                                                                                                                                                                                    | (1 = many problems, 5 = no problems)                                                                                                                                                                                                                                                                                                                                                                                                                                                                                                                                                                                                                                          |   |   |   |   |   |   |                                                                           |  |  |  |  |  |                                                                 |  |  |  |  |  |                                                            |  |  |  |  |  |                                                                      |  |  |  |  |  |
|------------------------------------------------------------------------------------------------------------------------------------------------------------------------------------------------------------------------------------------------------------------------------------------------------------------------------------------------------------------------------------------------------------------------------------------------------------------------------------------------------------------------------------------------------------------------------------------------------------------------------------------------------------------------------------------------------------------------------------------------------------------------------------------------------------------------------------------------------------------------------------------------------------------------------------------------------------------------------------------------------------------------------------------------------------------------------------------------------------------------------------------------------------------------------------------------------------------------------------------------------------------------------------------------------------------------------------|-------------------------------------------------------------------------------------------------------------------------------------------------------------------------------------------------------------------------------------------------------------------------------------------------------------------------------------------------------------------------------------------------------------------------------------------------------------------------------------------------------------------------------------------------------------------------------------------------------------------------------------------------------------------------------|---|---|---|---|---|---|---------------------------------------------------------------------------|--|--|--|--|--|-----------------------------------------------------------------|--|--|--|--|--|------------------------------------------------------------|--|--|--|--|--|----------------------------------------------------------------------|--|--|--|--|--|
|                                                                                                                                                                                                                                                                                                                                                                                                                                                                                                                                                                                                                                                                                                                                                                                                                                                                                                                                                                                                                                                                                                                                                                                                                                                                                                                                    | <table border="1"> <thead> <tr> <th></th><th>1</th><th>2</th><th>3</th><th>4</th><th>5</th></tr> </thead> <tbody> <tr> <td>Explaining the meaning of the menu label to (potential) restaurant guests</td><td></td><td></td><td></td><td></td><td></td></tr> <tr> <td>Coming up with dishes that meet the criteria for the menu label</td><td></td><td></td><td></td><td></td><td></td></tr> <tr> <td>Preparing dishes that meet the criteria for the menu label</td><td></td><td></td><td></td><td></td><td></td></tr> <tr> <td>Time it takes to calculate the nutritional information of the dishes</td><td></td><td></td><td></td><td></td><td></td></tr> </tbody> </table> |   | 1 | 2 | 3 | 4 | 5 | Explaining the meaning of the menu label to (potential) restaurant guests |  |  |  |  |  | Coming up with dishes that meet the criteria for the menu label |  |  |  |  |  | Preparing dishes that meet the criteria for the menu label |  |  |  |  |  | Time it takes to calculate the nutritional information of the dishes |  |  |  |  |  |
|                                                                                                                                                                                                                                                                                                                                                                                                                                                                                                                                                                                                                                                                                                                                                                                                                                                                                                                                                                                                                                                                                                                                                                                                                                                                                                                                    | 1                                                                                                                                                                                                                                                                                                                                                                                                                                                                                                                                                                                                                                                                             | 2 | 3 | 4 | 5 |   |   |                                                                           |  |  |  |  |  |                                                                 |  |  |  |  |  |                                                            |  |  |  |  |  |                                                                      |  |  |  |  |  |
| Explaining the meaning of the menu label to (potential) restaurant guests                                                                                                                                                                                                                                                                                                                                                                                                                                                                                                                                                                                                                                                                                                                                                                                                                                                                                                                                                                                                                                                                                                                                                                                                                                                          |                                                                                                                                                                                                                                                                                                                                                                                                                                                                                                                                                                                                                                                                               |   |   |   |   |   |   |                                                                           |  |  |  |  |  |                                                                 |  |  |  |  |  |                                                            |  |  |  |  |  |                                                                      |  |  |  |  |  |
| Coming up with dishes that meet the criteria for the menu label                                                                                                                                                                                                                                                                                                                                                                                                                                                                                                                                                                                                                                                                                                                                                                                                                                                                                                                                                                                                                                                                                                                                                                                                                                                                    |                                                                                                                                                                                                                                                                                                                                                                                                                                                                                                                                                                                                                                                                               |   |   |   |   |   |   |                                                                           |  |  |  |  |  |                                                                 |  |  |  |  |  |                                                            |  |  |  |  |  |                                                                      |  |  |  |  |  |
| Preparing dishes that meet the criteria for the menu label                                                                                                                                                                                                                                                                                                                                                                                                                                                                                                                                                                                                                                                                                                                                                                                                                                                                                                                                                                                                                                                                                                                                                                                                                                                                         |                                                                                                                                                                                                                                                                                                                                                                                                                                                                                                                                                                                                                                                                               |   |   |   |   |   |   |                                                                           |  |  |  |  |  |                                                                 |  |  |  |  |  |                                                            |  |  |  |  |  |                                                                      |  |  |  |  |  |
| Time it takes to calculate the nutritional information of the dishes                                                                                                                                                                                                                                                                                                                                                                                                                                                                                                                                                                                                                                                                                                                                                                                                                                                                                                                                                                                                                                                                                                                                                                                                                                                               |                                                                                                                                                                                                                                                                                                                                                                                                                                                                                                                                                                                                                                                                               |   |   |   |   |   |   |                                                                           |  |  |  |  |  |                                                                 |  |  |  |  |  |                                                            |  |  |  |  |  |                                                                      |  |  |  |  |  |
| 6.                                                                                                                                                                                                                                                                                                                                                                                                                                                                                                                                                                                                                                                                                                                                                                                                                                                                                                                                                                                                                                                                                                                                                                                                                                                                                                                                 | <p>How much value do you think your guests attach to health aspects of the menu items when dining out?<br/>(1 = no value, 5 = a lot of value)</p> <p><input type="checkbox"/> 1   <input type="checkbox"/> 2   <input type="checkbox"/> 3   <input type="checkbox"/> 4   <input type="checkbox"/> 5</p>                                                                                                                                                                                                                                                                                                                                                                       |   |   |   |   |   |   |                                                                           |  |  |  |  |  |                                                                 |  |  |  |  |  |                                                            |  |  |  |  |  |                                                                      |  |  |  |  |  |
| 7.                                                                                                                                                                                                                                                                                                                                                                                                                                                                                                                                                                                                                                                                                                                                                                                                                                                                                                                                                                                                                                                                                                                                                                                                                                                                                                                                 | <p>How much value do you attach yourself to preparing healthy dishes for you restaurant guests?<br/>(1 = no value, 5 = a lot of value)</p> <p><input type="checkbox"/> 1   <input type="checkbox"/> 2   <input type="checkbox"/> 3   <input type="checkbox"/> 4   <input type="checkbox"/> 5</p>                                                                                                                                                                                                                                                                                                                                                                              |   |   |   |   |   |   |                                                                           |  |  |  |  |  |                                                                 |  |  |  |  |  |                                                            |  |  |  |  |  |                                                                      |  |  |  |  |  |
| <p>Below some questions will follow with regard to three developed menu labels.<br/>The next three questions relate to the image below. Please take a proper look at this image.</p> <div style="display: flex; align-items: center;">  <div style="margin-left: 20px;"> <p><b>MEAL SALADS</b></p> <p><b>Ceasar salad</b> with grilled chicken, romaine lettuce, Italian cheese and croutons</p> <p><b>Tuna Salad</b> with tuna, green beans, egg, black olives and herb dressing</p> <p><b>Chicken bacon salad</b> with pasta, chicken, bacon, red pepper and honey mustard dressing</p> <p><b>MAIN DISHES</b></p> <p><b>Pasta prosciutto</b> with macaroni, ham and creamy cheese sauce</p> <p><b>Spaghetti bolognese</b> spaghetti with minced beef in a red tomato sauce, smoked bacon and Italian herbs</p> <p><b>Richly filled lasagna</b> with minced beef, Bolognese sauce, fresh lasagne sheets and vegetables</p> <p><b>Leek curry stew</b> with fried ground meat, creamy potato puree and curry gravy</p> <p><b>Chicken tandoori</b> Indian dish with marinated chicken, tomato and basmati rice</p> <p><b>Rosemary chicken</b> marinated chicken breast with seasoned baby potatoes, haricots verts and rosemary</p> </div> </div> |                                                                                                                                                                                                                                                                                                                                                                                                                                                                                                                                                                                                                                                                               |   |   |   |   |   |   |                                                                           |  |  |  |  |  |                                                                 |  |  |  |  |  |                                                            |  |  |  |  |  |                                                                      |  |  |  |  |  |
| 8.                                                                                                                                                                                                                                                                                                                                                                                                                                                                                                                                                                                                                                                                                                                                                                                                                                                                                                                                                                                                                                                                                                                                                                                                                                                                                                                                 | <p>What does this menu labeling format communicates according to you?<br/>(1 = not, 5 = strongly)</p>                                                                                                                                                                                                                                                                                                                                                                                                                                                                                                                                                                         |   |   |   |   |   |   |                                                                           |  |  |  |  |  |                                                                 |  |  |  |  |  |                                                            |  |  |  |  |  |                                                                      |  |  |  |  |  |

|    |                                                                                                                                                                                                                                                                                            |   |   |   |   |   |
|----|--------------------------------------------------------------------------------------------------------------------------------------------------------------------------------------------------------------------------------------------------------------------------------------------|---|---|---|---|---|
|    | Good to prevent heart disease                                                                                                                                                                                                                                                              | 1 | 2 | 3 | 4 | 5 |
|    | Good nutrient composition                                                                                                                                                                                                                                                                  | 1 | 2 | 3 | 4 | 5 |
|    | Low energy                                                                                                                                                                                                                                                                                 | 1 | 2 | 3 | 4 | 5 |
|    | Low in fat                                                                                                                                                                                                                                                                                 | 1 | 2 | 3 | 4 | 5 |
|    | Conscious choice                                                                                                                                                                                                                                                                           | 1 | 2 | 3 | 4 | 5 |
|    | Organic                                                                                                                                                                                                                                                                                    | 1 | 2 | 3 | 4 | 5 |
|    | Sustainable                                                                                                                                                                                                                                                                                | 1 | 2 | 3 | 4 | 5 |
|    | Healthy choice                                                                                                                                                                                                                                                                             | 1 | 2 | 3 | 4 | 5 |
|    | Tasteful                                                                                                                                                                                                                                                                                   | 1 | 2 | 3 | 4 | 5 |
|    |                                                                                                                                                                                                                                                                                            |   |   |   |   |   |
| 9. | <p>To what extent would this menu label format influence restaurant guests' menu choice according to you?<br/>(1= not, 5 =a lot)</p> <p><input type="checkbox"/> 1   <input type="checkbox"/> 2   <input type="checkbox"/> 3   <input type="checkbox"/> 4   <input type="checkbox"/> 5</p> |   |   |   |   |   |

The next three questions relate to the image below. Please take a proper look at this image.

☆☆☆

MEAL SALADS

☆☆☆

Ceasar salad with grilled chicken, romaine lettuce, Italian cheese and croutons

☆☆☆

Tuna Salad with tuna, green beans, egg, black olives and herb dressing

☆☆☆

Chicken bacon salad with pasta, chicken, bacon, red pepper and honey mustard dressing

☆☆☆

MAIN DISHES

☆☆☆

Pasta prosciutto with macaroni, ham and creamy cheese sauce

☆☆☆

Spaghetti bolognese spaghetti with minced beef in a red tomato sauce, smoked bacon and Italian herbs

☆☆☆

Richly filled lasagna with minced beef, Bolognese sauce, fresh lasagne sheets and vegetables

☆☆☆

Leek curry stew with fried minced meat, creamy potato puree and curry gravy

☆☆☆

Chicken tandoori Indian dish with marinated chicken, tomato and basmati rice

☆☆☆

Rosemary chicken marinated chicken breast with seasoned baby potatoes, haricots verts and rosemary

☆☆☆

Less healthy

☆☆☆

Healthier

☆☆☆

The healthiest choice

|                               |                                                                                                                                                                                                                                                                                                                                                                                                                                                                                                                                                                                                                                                                                                            |   |   |   |   |  |                               |   |   |   |   |   |                           |   |   |   |   |   |            |   |   |   |   |   |            |   |   |   |   |   |                  |   |   |   |   |   |         |   |   |   |   |   |
|-------------------------------|------------------------------------------------------------------------------------------------------------------------------------------------------------------------------------------------------------------------------------------------------------------------------------------------------------------------------------------------------------------------------------------------------------------------------------------------------------------------------------------------------------------------------------------------------------------------------------------------------------------------------------------------------------------------------------------------------------|---|---|---|---|--|-------------------------------|---|---|---|---|---|---------------------------|---|---|---|---|---|------------|---|---|---|---|---|------------|---|---|---|---|---|------------------|---|---|---|---|---|---------|---|---|---|---|---|
| 10.                           | <p>What does this menu labeling format communicates according to you?<br/>(1 = not, 5 = strongly)</p> <table border="1"> <tr> <td>Good to prevent heart disease</td> <td>1</td> <td>2</td> <td>3</td> <td>4</td> <td>5</td> </tr> <tr> <td>Good nutrient composition</td> <td>1</td> <td>2</td> <td>3</td> <td>4</td> <td>5</td> </tr> <tr> <td>Low energy</td> <td>1</td> <td>2</td> <td>3</td> <td>4</td> <td>5</td> </tr> <tr> <td>Low in fat</td> <td>1</td> <td>2</td> <td>3</td> <td>4</td> <td>5</td> </tr> <tr> <td>Conscious choice</td> <td>1</td> <td>2</td> <td>3</td> <td>4</td> <td>5</td> </tr> <tr> <td>Organic</td> <td>1</td> <td>2</td> <td>3</td> <td>4</td> <td>5</td> </tr> </table> |   |   |   |   |  | Good to prevent heart disease | 1 | 2 | 3 | 4 | 5 | Good nutrient composition | 1 | 2 | 3 | 4 | 5 | Low energy | 1 | 2 | 3 | 4 | 5 | Low in fat | 1 | 2 | 3 | 4 | 5 | Conscious choice | 1 | 2 | 3 | 4 | 5 | Organic | 1 | 2 | 3 | 4 | 5 |
| Good to prevent heart disease | 1                                                                                                                                                                                                                                                                                                                                                                                                                                                                                                                                                                                                                                                                                                          | 2 | 3 | 4 | 5 |  |                               |   |   |   |   |   |                           |   |   |   |   |   |            |   |   |   |   |   |            |   |   |   |   |   |                  |   |   |   |   |   |         |   |   |   |   |   |
| Good nutrient composition     | 1                                                                                                                                                                                                                                                                                                                                                                                                                                                                                                                                                                                                                                                                                                          | 2 | 3 | 4 | 5 |  |                               |   |   |   |   |   |                           |   |   |   |   |   |            |   |   |   |   |   |            |   |   |   |   |   |                  |   |   |   |   |   |         |   |   |   |   |   |
| Low energy                    | 1                                                                                                                                                                                                                                                                                                                                                                                                                                                                                                                                                                                                                                                                                                          | 2 | 3 | 4 | 5 |  |                               |   |   |   |   |   |                           |   |   |   |   |   |            |   |   |   |   |   |            |   |   |   |   |   |                  |   |   |   |   |   |         |   |   |   |   |   |
| Low in fat                    | 1                                                                                                                                                                                                                                                                                                                                                                                                                                                                                                                                                                                                                                                                                                          | 2 | 3 | 4 | 5 |  |                               |   |   |   |   |   |                           |   |   |   |   |   |            |   |   |   |   |   |            |   |   |   |   |   |                  |   |   |   |   |   |         |   |   |   |   |   |
| Conscious choice              | 1                                                                                                                                                                                                                                                                                                                                                                                                                                                                                                                                                                                                                                                                                                          | 2 | 3 | 4 | 5 |  |                               |   |   |   |   |   |                           |   |   |   |   |   |            |   |   |   |   |   |            |   |   |   |   |   |                  |   |   |   |   |   |         |   |   |   |   |   |
| Organic                       | 1                                                                                                                                                                                                                                                                                                                                                                                                                                                                                                                                                                                                                                                                                                          | 2 | 3 | 4 | 5 |  |                               |   |   |   |   |   |                           |   |   |   |   |   |            |   |   |   |   |   |            |   |   |   |   |   |                  |   |   |   |   |   |         |   |   |   |   |   |



|     |                                                                                                                                                                                                                                                                                            |   |   |   |   |   |
|-----|--------------------------------------------------------------------------------------------------------------------------------------------------------------------------------------------------------------------------------------------------------------------------------------------|---|---|---|---|---|
|     | Sustainable                                                                                                                                                                                                                                                                                | 1 | 2 | 3 | 4 | 5 |
|     | Healthy choice                                                                                                                                                                                                                                                                             | 1 | 2 | 3 | 4 | 5 |
|     | Tasteful                                                                                                                                                                                                                                                                                   | 1 | 2 | 3 | 4 | 5 |
| 11. | <p>To what extent would this menu label format influence restaurant guests' menu choice according to you?<br/>(1= not, 5 =a lot)</p> <p><input type="checkbox"/> 1   <input type="checkbox"/> 2   <input type="checkbox"/> 3   <input type="checkbox"/> 4   <input type="checkbox"/> 5</p> |   |   |   |   |   |

The next three questions relate to the image below. Please take a proper look at this image  
This menu indicates how much energy (kcal) a dish contains. Recommended per day:  
women 2000 kcal, men: 2500 kcal.

|             |                                                                                                             |
|-------------|-------------------------------------------------------------------------------------------------------------|
| <b>Kcal</b> | <b>MEAL SALADS</b>                                                                                          |
| 465         | <b>Cesar salad</b> with grilled chicken, romaine lettuce, Italian cheese and croutons                       |
| 460         | <b>Tuna Salad</b> with tuna, green beans, egg, black olives and herb dressing                               |
| 740         | <b>Chicken bacon salad</b> with pasta, chicken, bacon, red pepper and honey mustard dressing                |
|             | <b>MAIN DISHES</b>                                                                                          |
| 690         | <b>Pasta prosciutto</b> with macaroni, ham and creamy cheese sauce                                          |
| 580         | <b>Spaghetti bolognese</b> spaghetti with minced beef in a red tomato sauce, smoked bacon and Italian herbs |
| 530         | <b>Richly filled lasagna</b> with minced beef, Bolognese sauce, fresh lasagne sheets and vegetables         |
| 585         | <b>Leek curry stew</b> with fried ground meat, creamy potato puree and curry gravy                          |
| 590         | <b>Chicken tandoori</b> Indian dish with marinated chicken, tomato and basmati rice                         |
| 490         | <b>Rosemary chicken</b> marinated chicken breast with seasoned baby potatoes, haricots verts and rosemary   |

|                               |                                                                                                                                                                                                                                                                                                                                                                                                                                                                                                                                                                                                                                                                                                                                                                                                                                                                                             |                               |   |   |   |   |   |                           |   |   |   |   |   |            |   |   |   |   |   |            |   |   |   |   |   |                  |   |   |   |   |   |         |   |   |   |   |   |             |   |   |   |   |   |                |   |   |   |   |   |          |   |   |   |   |   |
|-------------------------------|---------------------------------------------------------------------------------------------------------------------------------------------------------------------------------------------------------------------------------------------------------------------------------------------------------------------------------------------------------------------------------------------------------------------------------------------------------------------------------------------------------------------------------------------------------------------------------------------------------------------------------------------------------------------------------------------------------------------------------------------------------------------------------------------------------------------------------------------------------------------------------------------|-------------------------------|---|---|---|---|---|---------------------------|---|---|---|---|---|------------|---|---|---|---|---|------------|---|---|---|---|---|------------------|---|---|---|---|---|---------|---|---|---|---|---|-------------|---|---|---|---|---|----------------|---|---|---|---|---|----------|---|---|---|---|---|
| 12.                           | <p>What does this menu labeling format communicates according to you?<br/>(1 = not, 5 = strongly)</p> <table><tr><td>Good to prevent heart disease</td><td>1</td><td>2</td><td>3</td><td>4</td><td>5</td></tr><tr><td>Good nutrient composition</td><td>1</td><td>2</td><td>3</td><td>4</td><td>5</td></tr><tr><td>Low energy</td><td>1</td><td>2</td><td>3</td><td>4</td><td>5</td></tr><tr><td>Low in fat</td><td>1</td><td>2</td><td>3</td><td>4</td><td>5</td></tr><tr><td>Conscious choice</td><td>1</td><td>2</td><td>3</td><td>4</td><td>5</td></tr><tr><td>Organic</td><td>1</td><td>2</td><td>3</td><td>4</td><td>5</td></tr><tr><td>Sustainable</td><td>1</td><td>2</td><td>3</td><td>4</td><td>5</td></tr><tr><td>Healthy choice</td><td>1</td><td>2</td><td>3</td><td>4</td><td>5</td></tr><tr><td>Tasteful</td><td>1</td><td>2</td><td>3</td><td>4</td><td>5</td></tr></table> | Good to prevent heart disease | 1 | 2 | 3 | 4 | 5 | Good nutrient composition | 1 | 2 | 3 | 4 | 5 | Low energy | 1 | 2 | 3 | 4 | 5 | Low in fat | 1 | 2 | 3 | 4 | 5 | Conscious choice | 1 | 2 | 3 | 4 | 5 | Organic | 1 | 2 | 3 | 4 | 5 | Sustainable | 1 | 2 | 3 | 4 | 5 | Healthy choice | 1 | 2 | 3 | 4 | 5 | Tasteful | 1 | 2 | 3 | 4 | 5 |
| Good to prevent heart disease | 1                                                                                                                                                                                                                                                                                                                                                                                                                                                                                                                                                                                                                                                                                                                                                                                                                                                                                           | 2                             | 3 | 4 | 5 |   |   |                           |   |   |   |   |   |            |   |   |   |   |   |            |   |   |   |   |   |                  |   |   |   |   |   |         |   |   |   |   |   |             |   |   |   |   |   |                |   |   |   |   |   |          |   |   |   |   |   |
| Good nutrient composition     | 1                                                                                                                                                                                                                                                                                                                                                                                                                                                                                                                                                                                                                                                                                                                                                                                                                                                                                           | 2                             | 3 | 4 | 5 |   |   |                           |   |   |   |   |   |            |   |   |   |   |   |            |   |   |   |   |   |                  |   |   |   |   |   |         |   |   |   |   |   |             |   |   |   |   |   |                |   |   |   |   |   |          |   |   |   |   |   |
| Low energy                    | 1                                                                                                                                                                                                                                                                                                                                                                                                                                                                                                                                                                                                                                                                                                                                                                                                                                                                                           | 2                             | 3 | 4 | 5 |   |   |                           |   |   |   |   |   |            |   |   |   |   |   |            |   |   |   |   |   |                  |   |   |   |   |   |         |   |   |   |   |   |             |   |   |   |   |   |                |   |   |   |   |   |          |   |   |   |   |   |
| Low in fat                    | 1                                                                                                                                                                                                                                                                                                                                                                                                                                                                                                                                                                                                                                                                                                                                                                                                                                                                                           | 2                             | 3 | 4 | 5 |   |   |                           |   |   |   |   |   |            |   |   |   |   |   |            |   |   |   |   |   |                  |   |   |   |   |   |         |   |   |   |   |   |             |   |   |   |   |   |                |   |   |   |   |   |          |   |   |   |   |   |
| Conscious choice              | 1                                                                                                                                                                                                                                                                                                                                                                                                                                                                                                                                                                                                                                                                                                                                                                                                                                                                                           | 2                             | 3 | 4 | 5 |   |   |                           |   |   |   |   |   |            |   |   |   |   |   |            |   |   |   |   |   |                  |   |   |   |   |   |         |   |   |   |   |   |             |   |   |   |   |   |                |   |   |   |   |   |          |   |   |   |   |   |
| Organic                       | 1                                                                                                                                                                                                                                                                                                                                                                                                                                                                                                                                                                                                                                                                                                                                                                                                                                                                                           | 2                             | 3 | 4 | 5 |   |   |                           |   |   |   |   |   |            |   |   |   |   |   |            |   |   |   |   |   |                  |   |   |   |   |   |         |   |   |   |   |   |             |   |   |   |   |   |                |   |   |   |   |   |          |   |   |   |   |   |
| Sustainable                   | 1                                                                                                                                                                                                                                                                                                                                                                                                                                                                                                                                                                                                                                                                                                                                                                                                                                                                                           | 2                             | 3 | 4 | 5 |   |   |                           |   |   |   |   |   |            |   |   |   |   |   |            |   |   |   |   |   |                  |   |   |   |   |   |         |   |   |   |   |   |             |   |   |   |   |   |                |   |   |   |   |   |          |   |   |   |   |   |
| Healthy choice                | 1                                                                                                                                                                                                                                                                                                                                                                                                                                                                                                                                                                                                                                                                                                                                                                                                                                                                                           | 2                             | 3 | 4 | 5 |   |   |                           |   |   |   |   |   |            |   |   |   |   |   |            |   |   |   |   |   |                  |   |   |   |   |   |         |   |   |   |   |   |             |   |   |   |   |   |                |   |   |   |   |   |          |   |   |   |   |   |
| Tasteful                      | 1                                                                                                                                                                                                                                                                                                                                                                                                                                                                                                                                                                                                                                                                                                                                                                                                                                                                                           | 2                             | 3 | 4 | 5 |   |   |                           |   |   |   |   |   |            |   |   |   |   |   |            |   |   |   |   |   |                  |   |   |   |   |   |         |   |   |   |   |   |             |   |   |   |   |   |                |   |   |   |   |   |          |   |   |   |   |   |
| 13.                           | <p>To what extent would this menu label format influence restaurant guests' menu choice according to you?<br/>(1= not, 5 =a lot)</p>                                                                                                                                                                                                                                                                                                                                                                                                                                                                                                                                                                                                                                                                                                                                                        |                               |   |   |   |   |   |                           |   |   |   |   |   |            |   |   |   |   |   |            |   |   |   |   |   |                  |   |   |   |   |   |         |   |   |   |   |   |             |   |   |   |   |   |                |   |   |   |   |   |          |   |   |   |   |   |

|     |                                                                                                                                                                                                                                                                                                                             |
|-----|-----------------------------------------------------------------------------------------------------------------------------------------------------------------------------------------------------------------------------------------------------------------------------------------------------------------------------|
|     | <input type="checkbox"/> 1 <input type="checkbox"/> 2 <input type="checkbox"/> 3 <input type="checkbox"/> 4 <input type="checkbox"/> 5                                                                                                                                                                                      |
| 14. | <p>Which menu label format to communicate that a dish is a healthy and conscious choice do you prefer most?</p> <ul style="list-style-type: none"> <li><input type="radio"/> Logo (menu label 1)</li> <li><input type="radio"/> Ranking (menu label 2)</li> <li><input type="radio"/> Information (menu label 3)</li> </ul> |
| 15. | <p>To what extent do you think implementing menu labeling positively distinguishes you from other restaurants? (1 = not, 5 = a lot)</p> <input type="checkbox"/> 1 <input type="checkbox"/> 2 <input type="checkbox"/> 3 <input type="checkbox"/> 4 <input type="checkbox"/> 5                                              |
